# Supplementary material for: Spinel zinc manganate-based high-capacity and high-stability non-aqueous zinc-ion batteries
Source: Royal Society of Chemistry journal article supplement (doi:10.1039/d3ta05805k), 2023-01-01
Supplement: d3ta05805k1.pdf [file d3ta05805k1.pdf]

## Supporting Information

# **Spinel Zinc Manganate-based High-Capacity and High-Stability Non-Aqueous Zinc-Ion Battery**

*Prakash Kumar Pathak,<sup>a</sup> Nitish Kumar,<sup>a</sup> Heejoon Ahn,<sup>b</sup> Rahul R. Salunkhe<sup>a\*</sup>*

<sup>a</sup>Department of Physics, Indian Institute of Technology Jammu, Jammu and Kashmir, 181221, India.

<sup>b</sup>Human-Tech Convergence Program, Department of Organic and Nano Engineering, Hanyang University, 222 Wangshimni-ro, Seongdong-gu, Seoul 04763, Republic of Korea.

\*E-mail: [rahul.salunkhe@iitjammu.ac.in](mailto:rahul.salunkhe@iitjammu.ac.in)

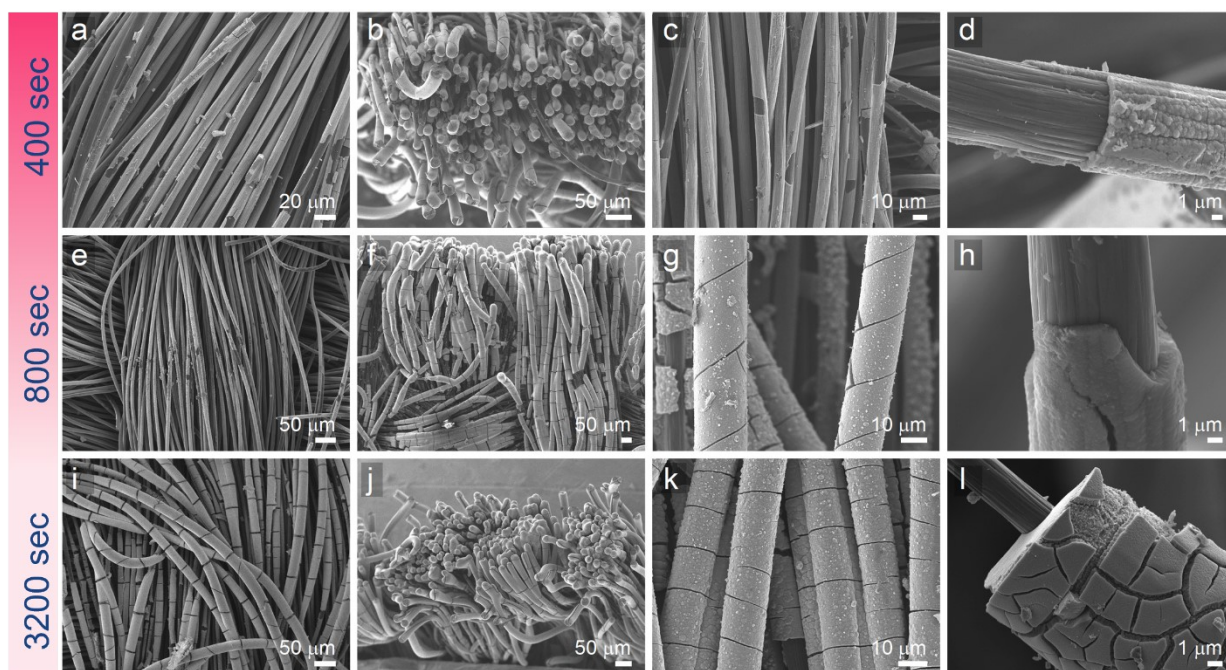

**Figure S1. ZMC with different electrodeposition times.** Low and high magnification images of (a-d) ZMC-4 (400 sec), (e-h) ZMC-8 (800 sec), (i-l) ZMC-32 (3200 sec). (b), (f) and (j) show the cross-sectional FESEM image of ZMC-4, ZMC-8 & and ZMC-32, respectively.

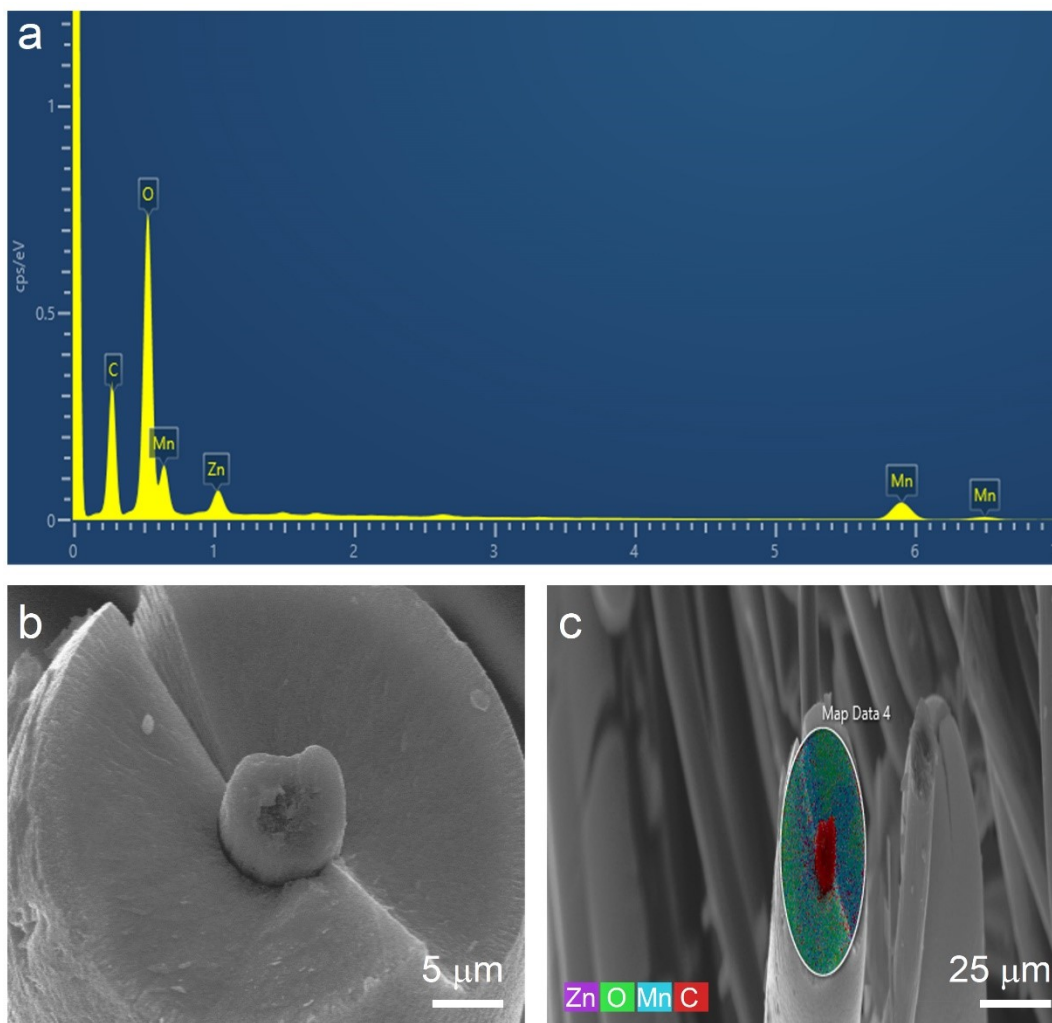

**Figure S2.** (a) EDS spectra of ZMC-32 (b) cross-sectional FESEM image with (c) overlapped EDS image of ZMC-32.

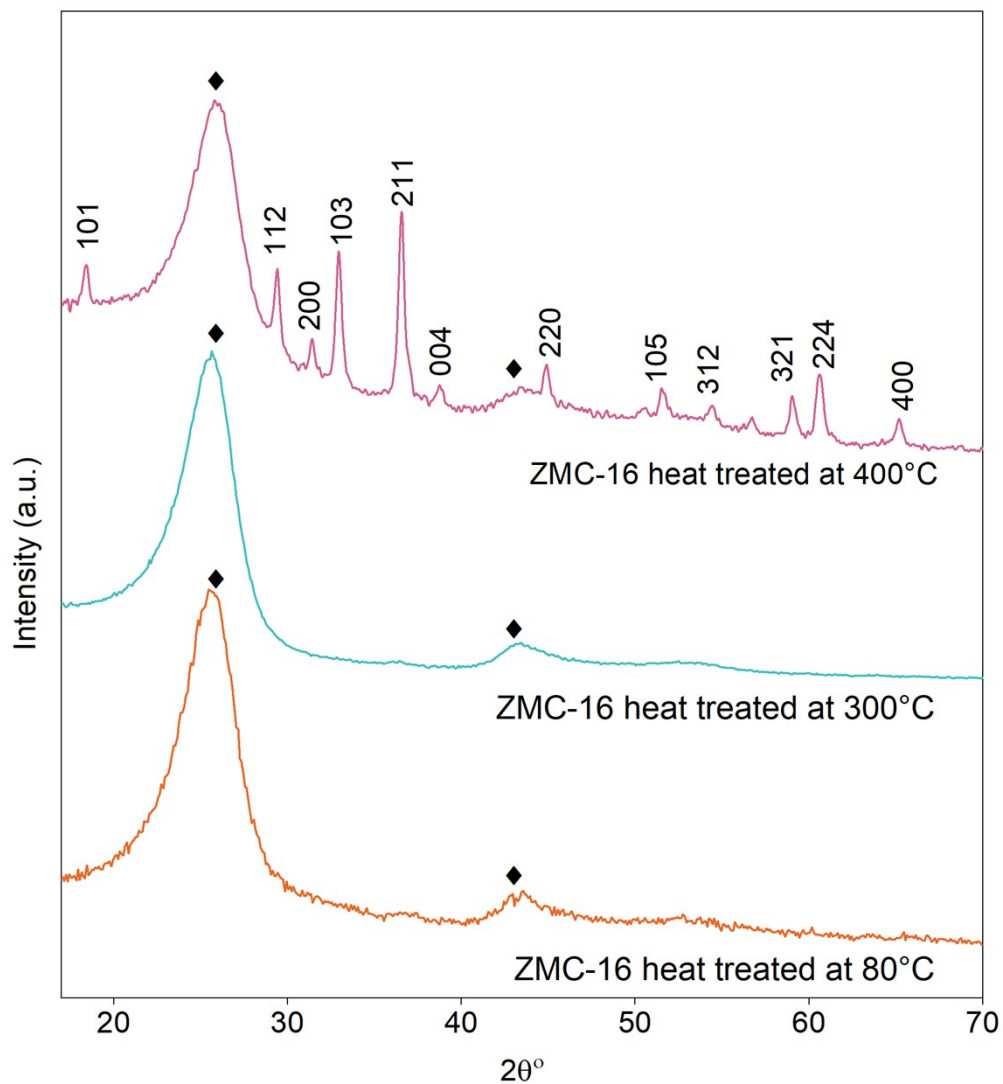

**Figure S3.** XRD pattern of ZMC-16 at various temperature conditions 80 °C, 300 °C, and 400 °C. The crystalline phase was observed after heat treatment of 400 °C. The asterisk mark indicates the peak occurred due to carbon cloth.

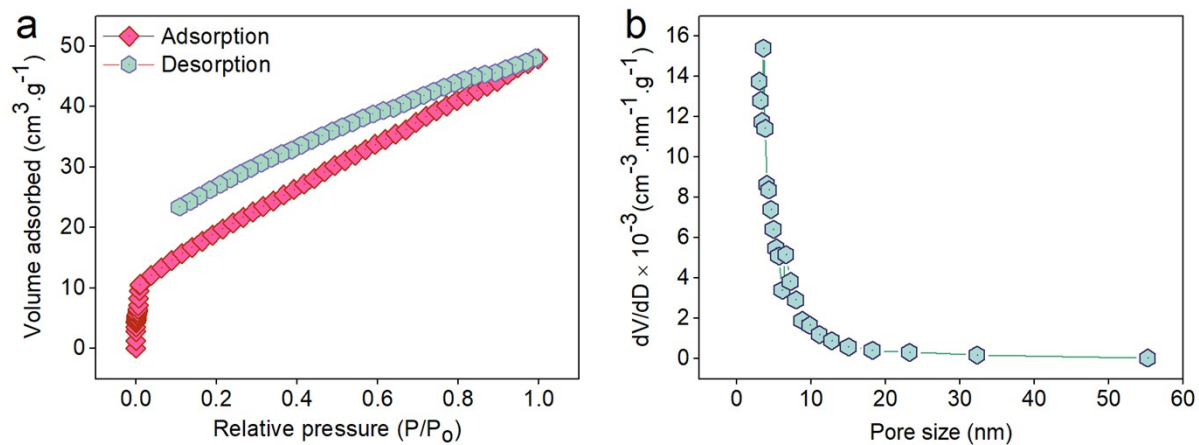

**Figure S4.** (a) Adsorption–desorption isotherms for the ZMC-16 sample at 77 K, and (f) BJH model pore size distribution of the same sample.

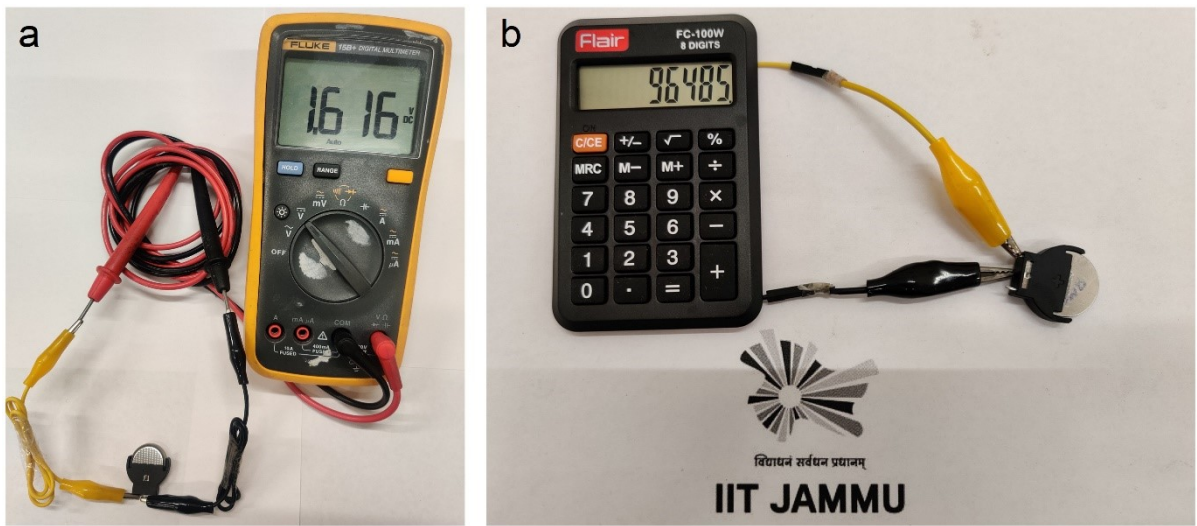

**Figure S5.** (a) Open circuit voltage of Zn//ZMC-16 measured after the cell has reached equilibrium, (b) a calculator being operated powered by ZMC ZIB.

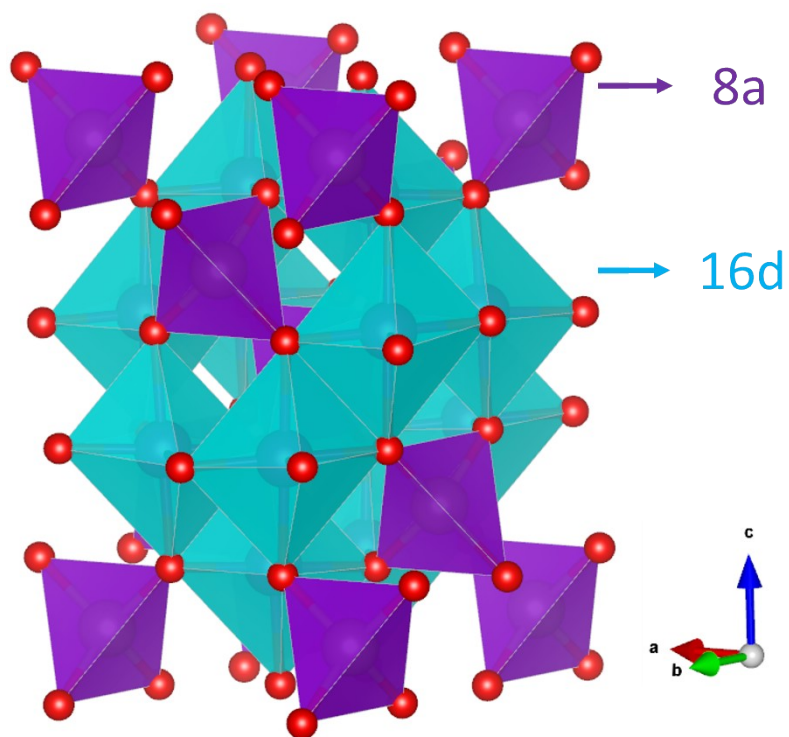

**Figure S6:** ZnMn<sub>2</sub>O<sub>4</sub> crystal structure with 8a tetrahedra shown in purple, 16d octahedra shown in cyan, oxygen atoms are indicated by red colour.

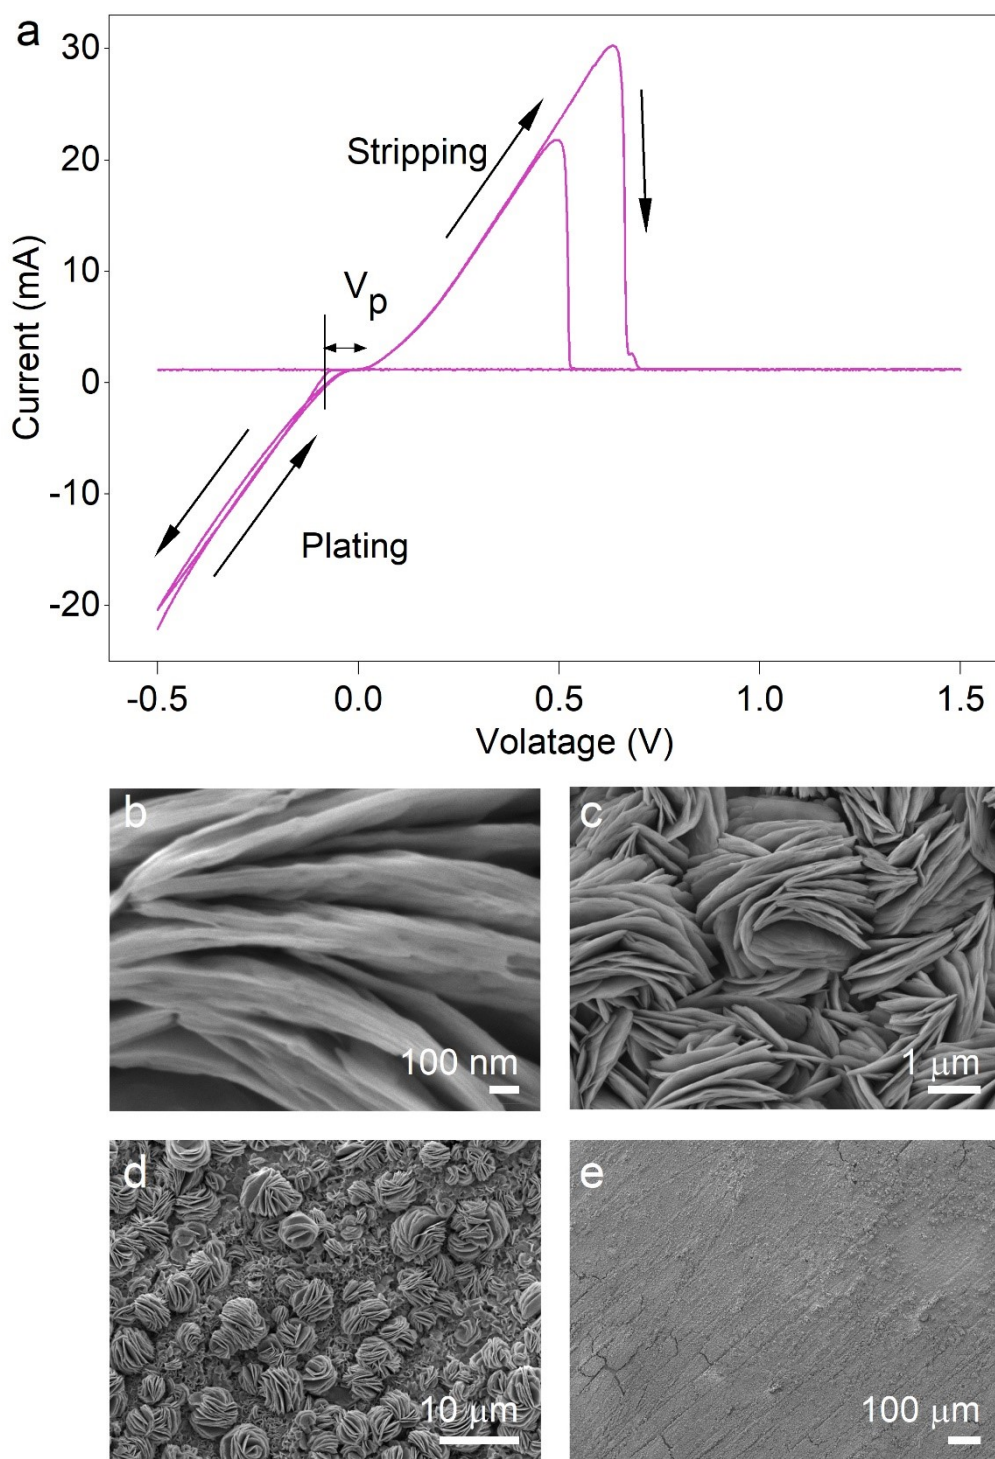

**Figure S7.** Stripping and plating study of zinc anode in 0.5 M  $\text{ZnClO}_4$  acetonitrile and corresponding FESEM images (a) CV curve in the voltage range of -0.5 V to 1.5 V at  $5 \text{ mV s}^{-1}$  (b-e) FESEM image of zinc foil at various magnifications after stripping and plating.



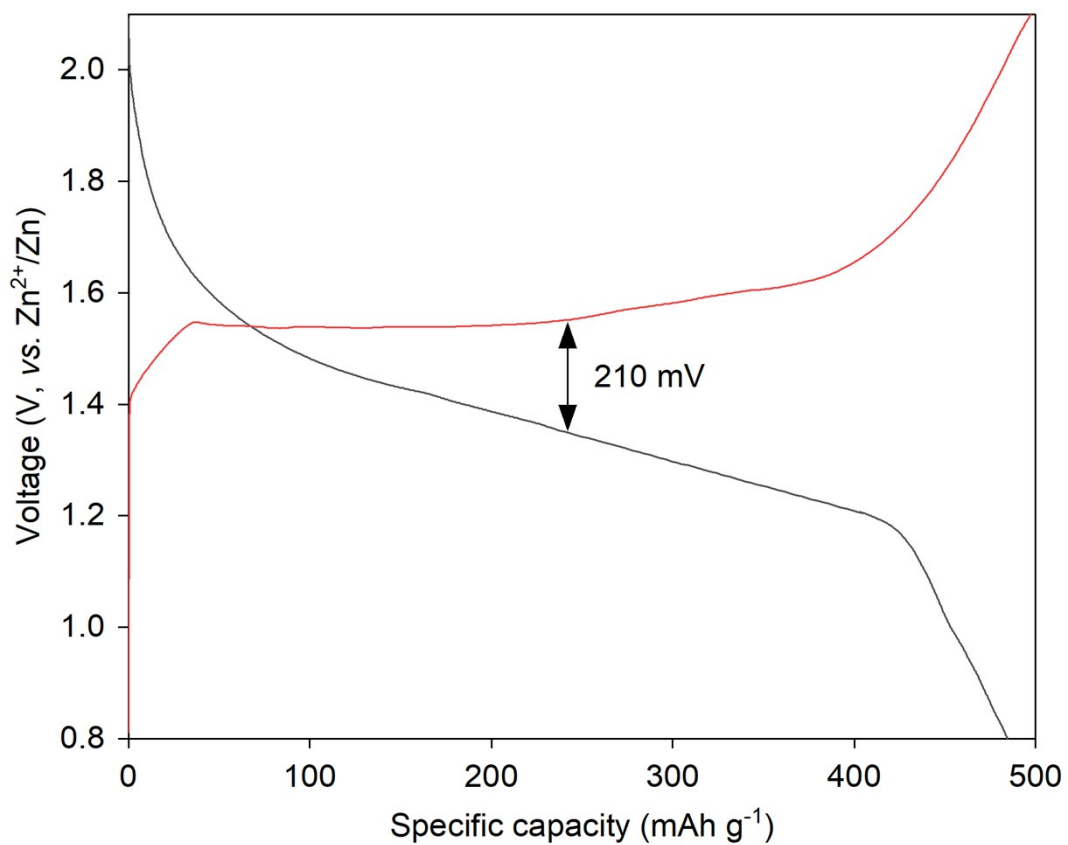

**Figure S8:** Charge discharge curve of ZMC-16 at a current rate of 50 mA g<sup>-1</sup> with polarization

voltage of 210 mV

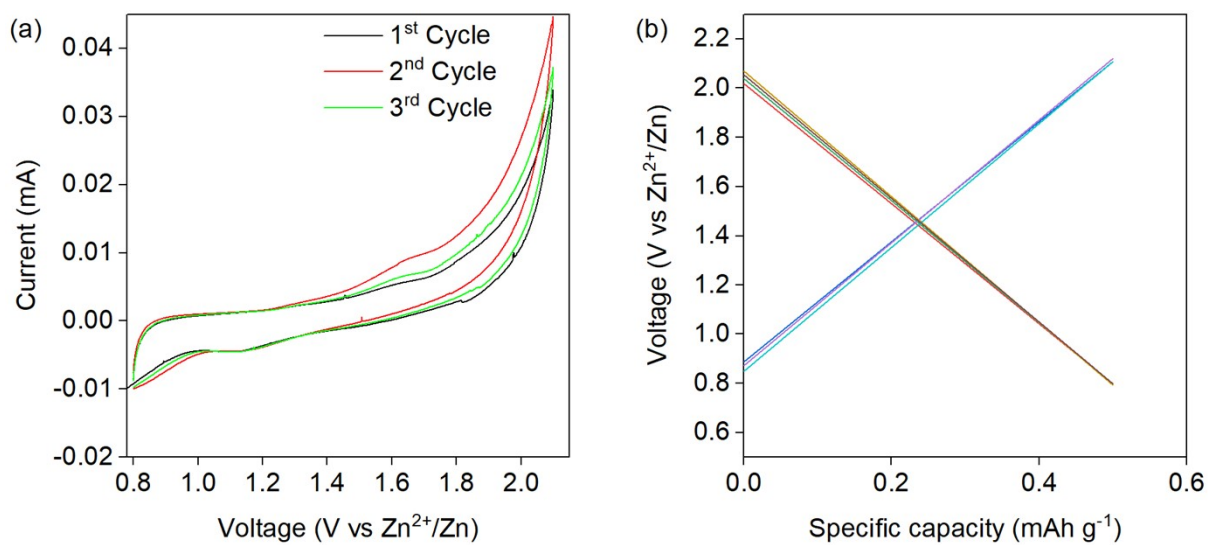

**Figure S9.** (a) CV curve of bare carbon cloth (CC) at 1 mV s<sup>-1</sup>. (b) GCD profile of bare CC at 50 mA g<sup>-1</sup>. Indicating no capacity contributions by CC

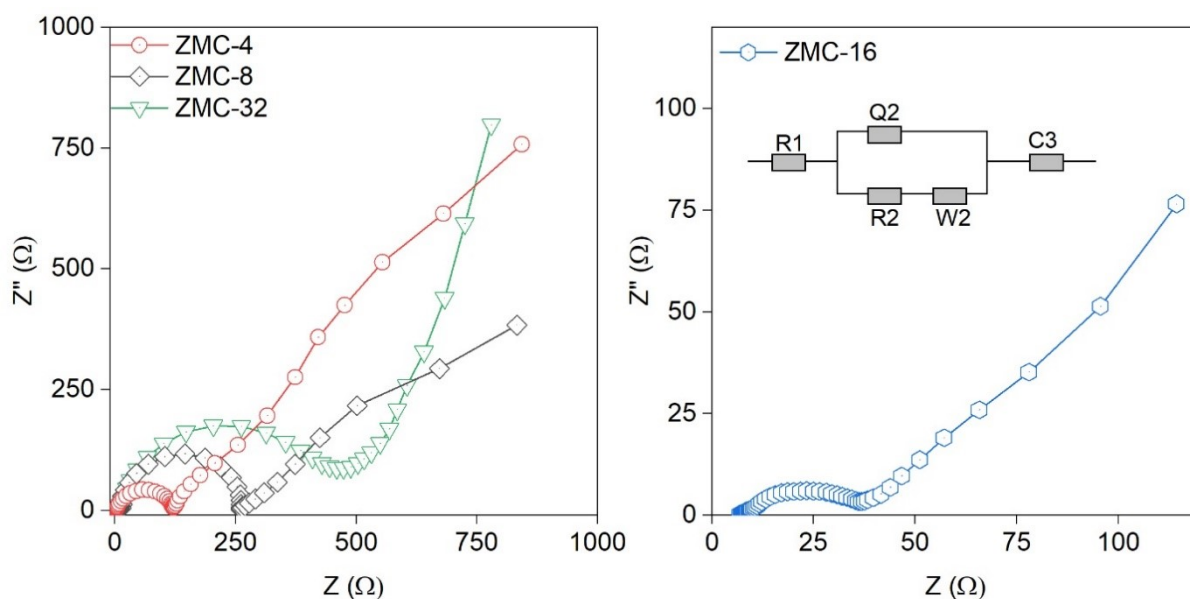

**Figure S10:** EIS was performed within the frequency range of 1 mHz to 1 MHz at  $10 \text{ mV s}^{-1}$ .

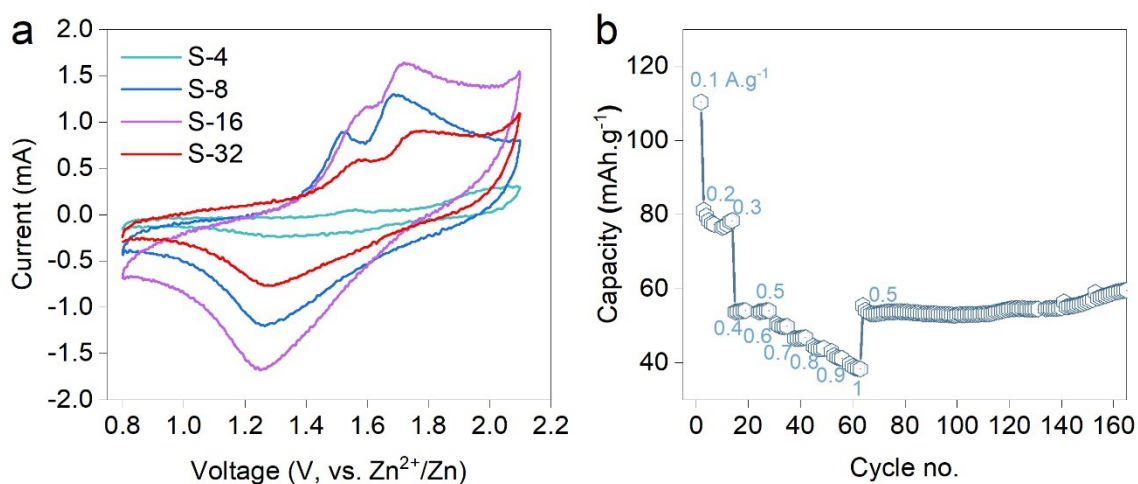

**Figure S11.** CV and rate capability of electrodeposited material prior to any heat treatment (a) CV curve of S-4/8/16/32 at a scan rate of  $5 \text{ mV s}^{-1}$ . (b) Rate capability test of S1600 at a different current rate ranging from  $0.1 \text{ A g}^{-1}$  to  $1 \text{ A g}^{-1}$ .

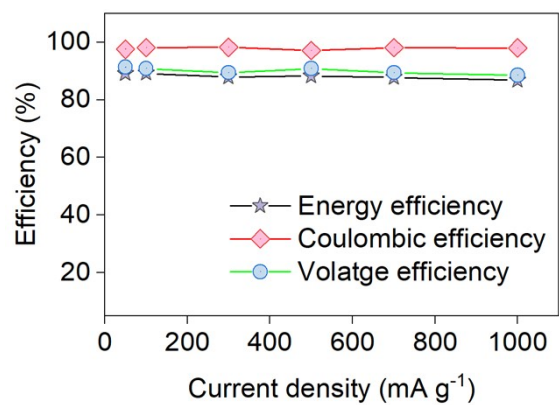

**Figure S12.** Energy, columbic, and voltage efficiency are plotted for various current densities.

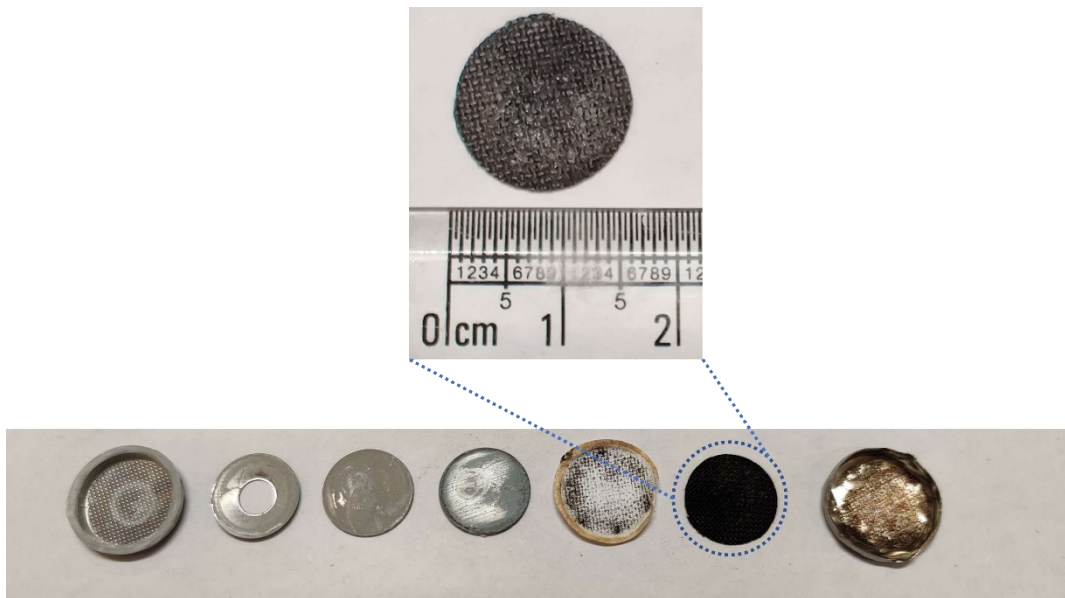

**Figure S13.** Coin cell de-crimped after 1000 cycles. (left to right) Negative casing, spring, spacer, metallic zinc (anode), separator, ZMC (cathode), and positive casing.

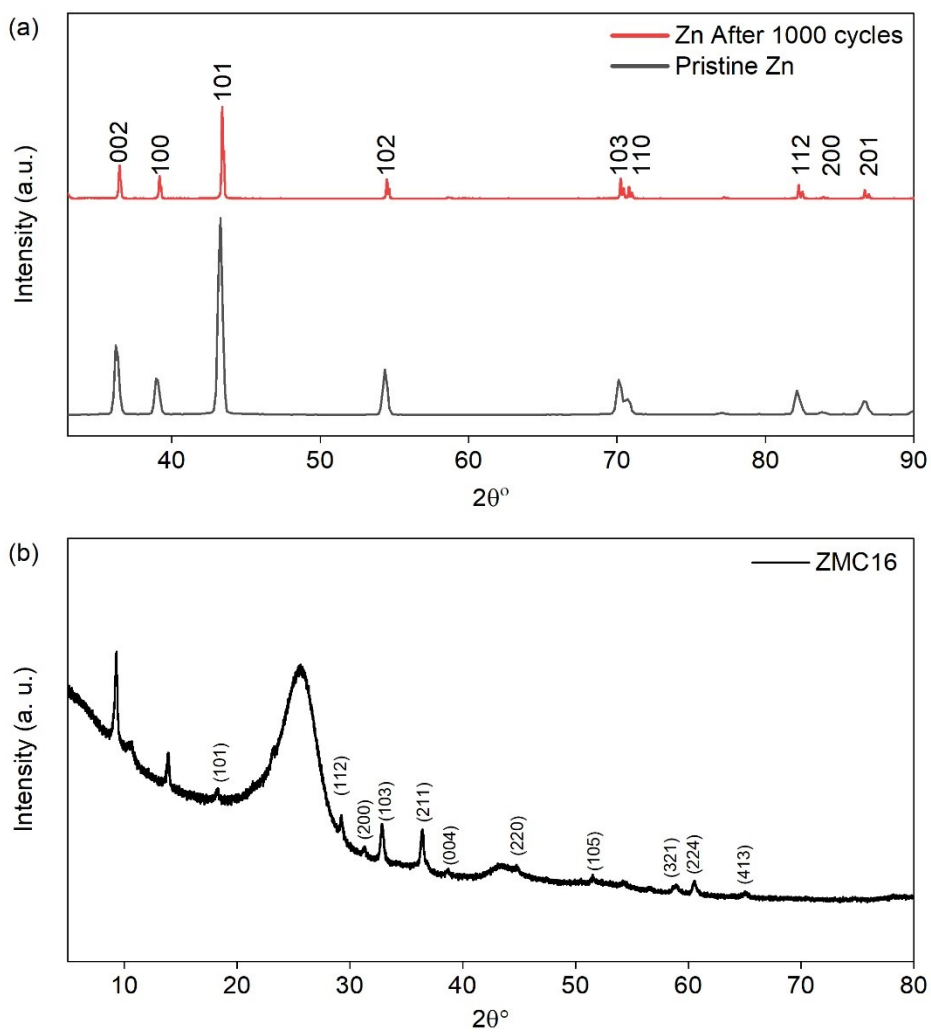

**Figure S14.** XRD pattern of anode and cathode after 1000 cycles. (a) The anode zinc foil of pristine and after 1000 cycles. (b) The cathode ZMC-16 cycled for 100 cycles.

## Note S1

### Energy density and power density calculation:

The specific capacity (mAh g<sup>-1</sup>) is calculated according to the equation<sup>1</sup>:

$$C = \frac{\int_0^{\Delta t} i \times dt}{m} \quad \dots (1)$$

where  $i$  (mA) is the applied discharging current,  $\Delta t$  (h) is the discharging time, and  $m$  (g) is the mass loading of active material.

The specific energy density (W h kg<sup>-1</sup>)  $E$  and specific power (W kg<sup>-1</sup>)  $P$  are estimated based on the formulas:

$$E = \frac{\int_0^{\Delta t} V \times i}{m} dt \quad \dots (2)$$

$$\text{And } P = \frac{E}{t} \quad \dots (3)$$

where  $C$  is the specific capacity from equation (1),  $V$  is the working voltage window (0.8-2.1V) and  $t$ (h) discharging time of the assembled batteries.

### Coulombic Efficiency, Energy Efficiency and Voltage Efficiency

To measure the reversibility of redox reaction coulombic efficiency (C.E.) and Energy efficiency (EE) is calculated as<sup>2</sup>:

$$CE = \frac{\int_0^{\Delta t} i_d dt}{\int_0^{\Delta t} i_c dt} \quad \dots (4)$$

$$EE = \frac{\int_0^{\Delta t} V_d i_d dt}{\int_0^{\Delta t} V_c i_c dt} \quad \dots (5)$$

Here,  $i_c$  and  $i_d$  is current during charge and discharge,  $V_c$  and  $V_d$  are volatge during charge and discharge,  $\Delta t$  is the time required for charge and discharge.

The voltage efficiency (VE) relation can be stated as

$$VE (\%) = \frac{EE}{CE} \quad \dots (6)$$



## NOTE S2

The reaction kinetics can be explained by Dunn's method, which provides information about diffusion-controlled processes. The current calculated from this method is<sup>3</sup>:

$$i = av^b \quad \dots(1)$$

$$I(v) = k_1(v)^{0.5} + k_2 v \quad \dots(2)$$

$$\frac{I(v)}{v^{0.5}} = k_1 + k_2 v^{0.5} \quad \dots(3)$$

Where  $I(v) \propto v$ ,  $k_1 v$  = capacitive current

$I(v) \propto v^{0.5}$ ,  $k_1 v^{0.5}$  = Diffusion-controlled current.

Where  $k_1$ ,  $k_2$ , and are intercept, slope, and scan rates for ZMC-16 at different scan rates (0.2-1 mV.s<sup>-1</sup>)

In addition, the Galvanostatic Intermittent Titration Technique (GITT) was used to quantify the ions' diffusion coefficients, which were then estimated using equation (4), shown below.

The formula for determining GITT using *Fick's second law*<sup>4</sup>:

$$D = \frac{4L^2 \left( \frac{\Delta E_s}{\Delta E_\tau} \right)^2}{\pi \tau} \quad \dots(4)$$

Here, the duration of the current pulse (s) is represented by  $t$ ,  $\tau$  is the relaxation time (s), and  $\Delta E_s$  represent the steady-state potential change (V) by the current pulse.  $\Delta E_\tau$  is the potential change (V) during the constant current pulse after eliminating the  $iR$  drop.  $L$  is the ion diffusion distance (cm), and the electrode thickness is often used to express its value.

**Table S1:** Detailed comparison of recently reported non aqueous and aqueous ZIB.

| S. No.                          | Cathode  Anode                                                                                       | Electrolyte                                                               | Capacity (mAh g <sup>-1</sup> ) @ Rate (mA g <sup>-1</sup> ) | Energy density (Wh Kg <sup>-1</sup> ) | Power (W Kg <sup>-1</sup> ) | Cycle life Performance (Retention% of initial discharge capacity mAh g <sup>-1</sup> after cycles at current rate mA g <sup>-1</sup> ) | Voltage Window (V) | Ref. |
|---------------------------------|------------------------------------------------------------------------------------------------------|---------------------------------------------------------------------------|--------------------------------------------------------------|---------------------------------------|-----------------------------|----------------------------------------------------------------------------------------------------------------------------------------|--------------------|------|
| <i>Non-aqueous electrolytes</i> |                                                                                                      |                                                                           |                                                              |                                       |                             |                                                                                                                                        |                    |      |
| 1                               | $\delta$ -MnO <sub>2</sub>   Zn                                                                      | 0.25 M (CF <sub>3</sub> SO <sub>3</sub> ) <sub>2</sub> Zn DMSO            | 159 @ 50                                                     | 175                                   | 56                          | 60% of 159 mAh g <sup>-1</sup> after 900 cycles at 6000 mA g <sup>-1</sup>                                                             | 0.75-1.8           | 5    |
| 2                               | K <sub>0.86</sub> Ni[Fe(CN) <sub>6</sub> ] <sub>0.954</sub> (H <sub>2</sub> O) <sub>0.766</sub>   Zn | 0.5 M Zn(ClO <sub>4</sub> ) <sub>2</sub> ACN                              | 55.6 @ 11.2                                                  | -                                     | -                           | 90% of 55.6 mAh g <sup>-1</sup> after 35 cycles at 11.2 mA g <sup>-1</sup>                                                             | 0.7-1.8            | 6    |
| 3                               | V <sub>3</sub> O <sub>7</sub> .H <sub>2</sub> O                                                      | 0.25 M Zn(CF <sub>3</sub> SO <sub>3</sub> ) <sub>2</sub> ACN              | 59 @ 5                                                       | -                                     | -                           | -                                                                                                                                      | 0.5-1.8            | 7    |
| 4                               | $\delta$ -MnO <sub>2</sub>   Zn                                                                      | 0.5 M Zn(TFSI) <sub>2</sub> ACN                                           | 123 @ 12.3                                                   | -                                     | -                           | 60% of 95 mAh g <sup>-1</sup> after 125 cycles at 12.3 mA g <sup>-1</sup>                                                              | 0.05-1.9           | 8    |
| 5                               | V <sub>2</sub> O <sub>5</sub>   Zn                                                                   | 0.5 M Zn(TFSI) <sub>2</sub> ACN                                           | 196 @ 14.4                                                   | 144                                   | 1500                        | > 90% of 164 mAh g <sup>-1</sup> after 120 cycles at 14.4 mA g <sup>-1</sup>                                                           | 0.3-1.5            | 9    |
| 6                               | Na <sub>2</sub> Mn[Fe(CN) <sub>6</sub> ] <sub>1</sub>   Zn                                           | 0.5 M Zn(CF <sub>3</sub> SO <sub>3</sub> ) <sub>2</sub> + 1M NaFSI in TMP | 89.3 @ 160                                                   | -                                     | -                           | 77% of 89.3 mAh g <sup>-1</sup> after 1000 cycles at 160 mA g <sup>-1</sup>                                                            | 1-2.2              | 10   |

|    |                                                                                         |                                                                                                                 |           |      |      |                                                                                   |          |    |
|----|-----------------------------------------------------------------------------------------|-----------------------------------------------------------------------------------------------------------------|-----------|------|------|-----------------------------------------------------------------------------------|----------|----|
| 7  | Graphite  Zn                                                                            | 1 M (Zn(TFSI) <sub>2</sub><br>ACN                                                                               | 53 @ 50   | 86.5 | 4400 | 97.3% of 42.7 mAh g <sup>-1</sup> after<br>1000 cycles at 1000 mA g <sup>-1</sup> | 1-2.55   | 11 |
| 8  | ZnAl <sub>x</sub> Co <sub>2-x</sub> O <sub>4</sub>   Zn                                 | 0.3 M<br>Zn(CF <sub>3</sub> SO <sub>3</sub> ) <sub>2</sub> in<br>MeCN                                           | 134 @ 32  | -    | -    | >75% of 134 mAh g <sup>-1</sup> after<br>1000 cycles at 1000 mA g <sup>-1</sup>   | 1.4-2.15 | 12 |
| 9  | Na <sub>3</sub> V <sub>2</sub> (PO <sub>4</sub> ) <sub>3</sub>   Zn                     | 1 M NaCF <sub>3</sub> SO <sub>4</sub> +<br>0.1 M<br>Zn(CF <sub>3</sub> SO <sub>3</sub> ) <sub>2</sub> in<br>TEP | 84 @ 500  | -    | -    | 100% of 84 mAh g <sup>-1</sup> after 600<br>cycles at 500 mA g <sup>-1</sup>      | 0.6-1.9  | 13 |
| 10 | Na <sub>3</sub> V <sub>2</sub> (PO <sub>4</sub> ) <sub>2</sub> O <sub>2</sub> F<br>  Zn | 0.5 M<br>Zn(CF <sub>3</sub> SO <sub>3</sub> ) <sub>2</sub> + 1<br>M NaClO <sub>4</sub> in<br>TMP                | 113 @ 130 | 203  | -    | 83.5% of 113 mAh g <sup>-1</sup> after<br>1000 cycles at 130 mA g <sup>-1</sup>   | 0.8-2.4  | 14 |
| 11 | Sodium<br>vanadate<br>(NVO)  Zn                                                         | 0.5 M ZnCl <sub>2</sub> -<br>ethaline DES                                                                       | 310 @ 100 | 282  | 90   | 68% of 244 mAh g <sup>-1</sup> after 300<br>cycles at 300 mA g <sup>-1</sup>      | 0.01-1.8 | 15 |
| 12 | Zn <sub>x</sub> Mo <sub>2.5+y</sub> VO <sub>9+z</sub>   Zn                              | 0.2 M<br>Zn(CF <sub>3</sub> SO <sub>3</sub> ) <sub>2</sub><br>in(PC)/ (DMSO)<br>(1 : 4)                         | 220 @ 20  | -    | -    | 77% of 220 mAh g <sup>-1</sup> after 35<br>cycles at 2 mA g <sup>-1</sup>         | 0.01-1.7 | 16 |
| 13 | ZnNi <sub>1/2</sub> Mn <sub>1/2</sub> Co<br>O <sub>4</sub>   Zn                         | 0.3 M<br>Zn(CF <sub>3</sub> SO <sub>3</sub> ) <sub>2</sub> +200<br>ppm (DABCO) in<br>MeCN                       | 180 @ 42  | 305  | -    | 81% of 180 mAh g <sup>-1</sup> after 200<br>cycles at 42 mA g <sup>-1</sup>       | 0.8-2.15 | 17 |
| 14 | 3D-NRAs-                                                                                | 1 M Zn(ClO <sub>4</sub> ) <sub>2</sub>                                                                          | 336 @ 50  | -    | -    | 85% of 207 mAh g <sup>-1</sup> after                                              | 0.4-1.6  | 18 |

| V <sub>2</sub> O <sub>5</sub>   Zn |                                                                                            | PC                                                            | 5000 cycles at 10000 mA g <sup>-1</sup> |       |      |                                                                                    |          |    |
|------------------------------------|--------------------------------------------------------------------------------------------|---------------------------------------------------------------|-----------------------------------------|-------|------|------------------------------------------------------------------------------------|----------|----|
| <i>Aqueous electrolytes</i>        |                                                                                            |                                                               |                                         |       |      |                                                                                    |          |    |
| 15                                 | V <sub>3</sub> O <sub>7</sub> H <sub>2</sub> O   Zn                                        | 1 M ZnSO <sub>4</sub>                                         | 325 @<br>1500                           | 240   | -    | 80% of 275 mAh g <sup>-1</sup> after 200<br>cycles at 3000 mA g <sup>-1</sup>      | 0.4-1.1  | 7  |
| 16                                 | MnVO  Zn                                                                                   | 3 M Zn(CF <sub>3</sub> SO <sub>3</sub> ) <sub>2</sub>         | 415 @ 50                                | 267   | 5791 | 92% of 260 mAh g <sup>-1</sup> after<br>2000 cycles at 4000 mA g <sup>-1</sup>     | 0.2-1.6  | 19 |
| 17                                 | Zn <sub>3</sub> V <sub>2</sub> O <sub>7</sub> (OH) <sub>2</sub> ·<br>2H <sub>2</sub> O  Zn | 1 M ZnSO <sub>4</sub>                                         | 213 @ 50                                | 214   | -    | 68% of 150 mAh g <sup>-1</sup> after 300<br>cycles at 200 mA g <sup>-1</sup>       | 0.2-1.8  | 20 |
| 18                                 | ZnMn <sub>2</sub> O <sub>4</sub>   Zn                                                      | 1 M ZnSO <sub>4</sub> + 0.1M<br>MnSO <sub>4</sub>             | 172 @ 100                               | 303   | -    | 79% of ≈ 62 mAh g <sup>-1</sup> after<br>1000 cycles at 2000 mA g <sup>-1</sup>    | 0.6 -1.9 | 21 |
| 19                                 | ZnMn <sub>2</sub> O <sub>4</sub> /C  Zn                                                    | 3 M Zn(CF <sub>3</sub> SO <sub>3</sub> ) <sub>2</sub>         | 150 @ 50                                | 202   | -    | 94% of ≈ 90 mAh g <sup>-1</sup> after<br>500 cycles at 500 mA g <sup>-1</sup>      | 0.8-1.9  | 22 |
| 20                                 | P–NiCo <sub>2</sub> O <sub>4-x</sub>   Zn                                                  | 1 M KOH +<br>0.05M Zn(ac) <sub>2</sub>                        | 365.8 @<br>3000                         | 616.5 | 5150 | 73.8% of 365.8 mAh g <sup>-1</sup> after<br>5000 cycles at 3000 mA g <sup>-1</sup> | 1.4-1.9  | 23 |
| 21                                 | ZnMn <sub>2</sub> O <sub>4</sub>   Zn                                                      | 1 M ZnSO <sub>4</sub><br>+0.05M MnSO <sub>4</sub>             | 134.7 @<br>100                          | -     | -    | 59.2% of 86 mAh g <sup>-1</sup> after 300<br>cycles at 100mA g <sup>-1</sup>       | 0.8–1.9  | 24 |
| 22                                 | PANI  Zn                                                                                   | 1 M Zn(CF <sub>3</sub> SO <sub>3</sub> ) <sub>2</sub>         | 191 @ 50                                | -     | -    | 92% of 82 mAh g <sup>-1</sup> after 3000<br>cycles at 5000mA g <sup>-1</sup>       | 0.5–1.5  | 25 |
| 23                                 | V <sub>2</sub> O <sub>5</sub> @<br>PEDOT  Zn                                               | 2.5 M<br>Zn(CF <sub>3</sub> SO <sub>3</sub> ) <sub>2</sub>    | 360 @100                                | -     | -    | 97% of 360 mAh g <sup>-1</sup> after 600<br>cycles at 1000 mA g <sup>-1</sup>      | 0.2-1.6  | 26 |
| 24                                 | NaV <sub>3</sub> O <sub>8</sub> ·1.5H <sub>2</sub> O<br>(NVO)  Zn                          | 1 M ZnSO <sub>4</sub> /1 M<br>Na <sub>2</sub> SO <sub>4</sub> | 380 @ 50                                | 300   | 86   | 82% of 165 mAh g <sup>-1</sup><br>after1000 at 4000 mA g <sup>-1</sup>             | 0.3–1.25 | 27 |
| 25                                 | Na <sub>0.33</sub> V <sub>2</sub> O   Zn                                                   | 3 M Zn(CF <sub>3</sub> SO <sub>3</sub> ) <sub>2</sub>         | 367.1 @<br>100                          | -     | -    | 93% of 218 mAh g <sup>-1</sup><br>after1000 cycles at 1000 mA                      | 0.2-1.6  | 28 |

| g <sup>-1</sup> |         |                                                    |          |     |    |                                                                                 |         |              |
|-----------------|---------|----------------------------------------------------|----------|-----|----|---------------------------------------------------------------------------------|---------|--------------|
| 26              | ZMC  Zn | 0.5 M Zn(ClO <sub>4</sub> ) <sub>2</sub><br>in ACN | 469 @ 50 | 632 | 70 | 88 % of 152 mAh g <sup>-1</sup> after<br>1000 cycles at 1000 mA g <sup>-1</sup> | 0.8-2.1 | This<br>work |

DMSO: Dimethyl sulfoxide; MeCN/ACN: Acetonitrile; TMP: Trimethyl phosphate; TEP: Triethyl phosphate; PC: propylene carbonate; DES: Deep eutectic solvents; DABCO: 1,4-diazabicyclo[2.2.2]octane.

## References:

- 1 Y. Shen, Z. Li, Z. Cui, K. Zhang, R. Zou, F. Yang and K. Xu, *J. Mater. Chem. A*, 2020, 8, 21044–21052.
- 2 P. Meister, H. Jia, J. Li, R. Kloepsch, M. Winter and T. Placke, *Chem. Mater.* 2016, 28, 7203–7217.
- 3 Y. Liu, C. Li, J. Xu, M. Ou, C. Fang, S. Sun, Y. Qiu, J. Peng, G. Lu, Q. Li, J. Han and Y. Huang, *Nano Energy*, 2020, 67, 104211.
- 4 R. Li, H. Zhang, Q. Zheng and X. Li, *J. Mater. Chem. A*, 2020, 8, 5186–5193.
- 5 W. Kao-ian, M. T. Nguyen, T. Yonezawa, R. Pornprasertsuk, J. Qin, S. Siwamogsatham and S. Kheawhom, *Mater. Today Energy*, 2021, 21, 100738.
- 6 M. S. Chae, J. W. Heo, H. H. Kwak, H. Lee and S. T. Hong, *J. Power Sources*, 2017, 337, 204–211.
- 7 D. Kundu, S. Hosseini Vajargah, L. Wan, B. Adams, D. Prendergast and L. F. Nazar, *Energy Environ. Sci.*, 2018, 11, 881–892.
- 8 S. D. Han, S. Kim, D. Li, V. Petkov, H. D. Yoo, P. J. Phillips, H. Wang, J. J. Kim, K. L. More, B. Key, R. F. Klie, J. Cabana, V. R. Stamenkovic, T. T. Fister, N. M. Markovic, A. K. Burrell, S. Tepavcevic and J. T. Vaughey, *Chem. Mater.*, 2017, 29, 4874–4884.
- 9 P. Senguttuvan, S. Han, S. Kim, A. L. Lipson, S. Tepavcevic, T. T. Fister, I. D. Bloom, A. K. Burrell and C. S. Johnson, *Adv. Energy Mater.*, 2016, 6, 1600826.
- 10 A. Naveed, J. Chen, B. Raza, Y. Liu and J. Wang, *J. Electroanal. Chem.*, 2022, 904, 115949.
- 11 N. Zhang, Y. Dong, Y. Wang, Y. Wang, J. Li, J. Xu, Y. Liu, L. Jiao and F. Cheng, *ACS Appl. Mater. Interfaces*, 2019, 11, 32978–32986.
- 12 C. Pan, R. G. Nuzzo and A. A. Gewirth, *Chem. Mater.*, 2017, 29, 9351–9359.
- 13 Q. Li, K. Ma, C. Hong, G. Yang and C. Wang, *Sci. China Mater.*, 2021, 64, 1386–1395.
- 14 Y. Dong, S. Di, F. Zhang, X. Bian, Y. Wang, J. Xu, L. Wang, F. Cheng and N. Zhang, *J. Mater. Chem. A*, 2020, 8, 3252–3261.
- 15 S. C. Wu, M. C. Tsa, H. J. Liao, T. Y. Su, S. Y. Tang, C. W. Chen, H. A. Lo, T. Y. Yang, K. Wang, Y. Ai, Y. Z. Chen, L. Lee, J. F. Lee, C. J. Lin, B. J. Hwang and Y. L. Chueh, *ACS Appl. Mater. Interfaces*, 2022, 14, 7814–7825.
- 16 W. Kaveevivitchai and A. Manthiram, *J. Mater. Chem. A*, 2016, 4, 18737–18741.
- 17 C. Pan, R. Zhang, R. G. Nuzzo and A. A. Gewirth, *Adv. Energy Mater.*, 2018, 8, 1800589.
- 18 D. Chen, X. Rui, Q. Zhang, H. Geng, L. Gan, W. Zhang, C. Li, S. Huang and Y. Yu, *Nano Energy*, 2019, 60, 171–178.
- 19 C. Liu, Z. Neale, J. Zheng, X. Jia, J. Huang, M. Yan, M. Tian, M. Wang, J. Yang and G. Cao, *Energy Environ. Sci.*, 2019, 12, 2273–2285.
- 20 C. Xia, J. Guo, Y. Lei, H. Liang, C. Zhao and H. N. Alshareef, *Adv. Mater.*, 2018, 30, 1705580.

- 21 V. Soundharrajan, B. Sambandam, S. Kim, S. Islam, J. Jo, S. Kim, V. Mathew, Y. Sun and J. Kim, *Energy Storage Mater.*, 2020, 28, 407–417.
- 22 N. Zhang, F. Cheng, Y. Liu, Q. Zhao, K. Lei, C. Chen, X. Liu and J. Chen, *J. Am. Chem. Soc.*, 2016, 138, 12894–12901.
- 23 Y. Zeng, Z. Lai, Y. Han, H. Zhang, S. Xie and X. Lu, *Adv. Mater.*, 2018, 30, 1802396.
- 24 X. Wu, Y. Xiang, Q. Peng, X. Wu, Y. Li, F. Tang, R. Song, Z. Liu, Z. He and X. Wu, *J. Mater. Chem. A*, 2017, 5, 17990–17997.
- 25 F. Wan, L. Zhang, X. Wang, S. Bi, Z. Niu and J. Chen, *Adv. Funct. Mater.*, 2018, 28, 1804975.
- 26 D. Xu, H. Wang, F. Li, Z. Guan, R. Wang, B. He, Y. Gong and X. Hu, *Adv. Mater. Interfaces*, 2019, 6, 1801506.
- 27 F. Wan, L. Zhang, X. Dai, X. Wang, Z. Niu and J. Chen, *Nat. Commun.*, 2018, 9, 1656.
- 28 P. He, G. Zhang, X. Liao, M. Yan, X. Xu, Q. An, J. Liu and L. Mai, *Adv. Energy Mater.*, 2018, 8, 1702463.
